# Supplementary material
Source: Springer Nature journal article supplement (https://www.springermedizin.de/resource/supplementary/12933_2009_226_MOESM3_ESM.pdf/9540022)
Supplement: MOESM3 [file 9540022]

Figure 3

Relationship between BMI (kg/m<sup>2</sup>) and Proportion of Entire Study Cohort (6,527) with Controlled BP\*

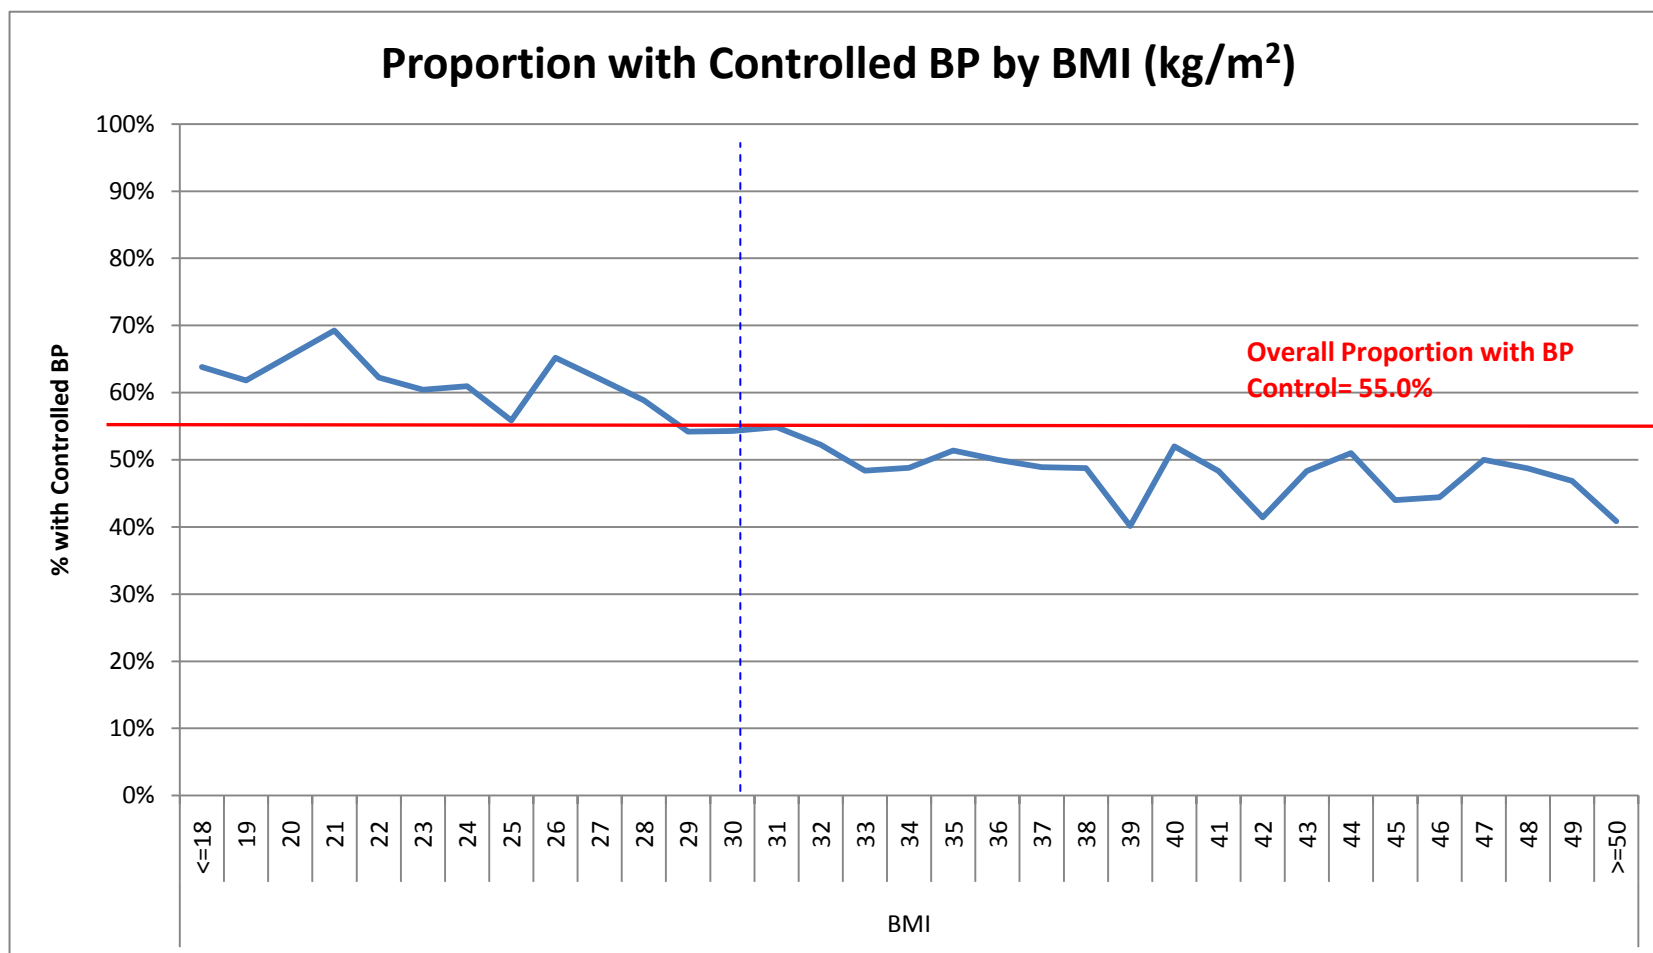

\*BP control defined as <140/90 mmHg for non-diabetic patients, and <130/80 mmHg for diabetic patients.
